# Supplementary material
Source: publisher site journal article supplement (https://www.dovepress.com/article/306966)

# **Serum levels of ITGBL1 as an early diagnostic biomarker for hepatocellular carcinoma with hepatitis B virus infection**

## **SUPPLEMENTARY MATERIALS**

Table of contents

|                                      |    |
|--------------------------------------|----|
| Definitions of Liver cirrhosis ..... | 1  |
| Supplementary Table 1.....           | 2  |
| Supplementary Table 2.....           | 3  |
| Supplementary Table 3.....           | 4  |
| Supplementary Table 4.....           | 5  |
| Supplementary Figure1.....           | 6  |
| Supplementary Figure2.....           | 7  |
| Supplementary Figure3.....           | 9  |
| Supplementary Figure4.....           | 10 |
| Supplementary Figure5.....           | 11 |

## 1 Definitions of Liver cirrhosis

(1) Histopathology is consistent with the diagnosis of liver cirrhosis;

(2) Without liver biopsy results, the patient should meet 1 of the following criteria:

- Ascites
- Hepatic encephalopathy
- Upper gastro-intestinal (esophageal and/or gastroduodenal) bleeding
- Hepatorenal syndrome

But non-cirrhotic portal hypertension should be excluded.

(3) If none of the criteria above are met, the patient should meet any 2 of the following criteria:

- Liver imaging (including B ultrasound, LSM or CT) showing characteristics of cirrhosis:  
nodular liver and/or splenomegaly
- Platelet count  $<150,000/\text{mm}^3$  in the absence of other explanation
- Liver stiffness measurement (by Fibroscan)  $>12$  kPa
- Gastro-esophageal varices as visualized by upper endoscop

**Supplementary Table 1: Patients clinicopathological characteristics in training and validation cohort.**

Baseline clinicopathological characteristics.

| Variable                                | Training cohort(n=299) | Validation cohort(n=417) | p-Value  |
|-----------------------------------------|------------------------|--------------------------|----------|
| Age, mean±SD(years)                     | 52±12                  | 52±12                    | P=0.7221 |
| Gender(male), n(%)                      | 238(79.60)             | 321(76.99)               | P=0.412  |
| Platelet count(×10 <sup>9</sup> /L)     | 147(88.5-200.5)        | 164(91.5-209)            | P=0.1774 |
| White blood cells (×10 <sup>9</sup> /L) | 5.2(4.05-6.50)         | 5.41(4.10-6.63)          | P=0.3515 |
| ALT, (IU/L)                             | 34(22-61)              | 31(20-51)                | P=0.0234 |
| AST, (IU/L)                             | 36(24-67)              | 30(23-48)                | P=0.0010 |
| GGT, (IU/L)                             | 43(24-118)             | 36(21-70)                | P=0.0024 |
| ITGBL1                                  | 55.42(33.68-77.65)     | 54.03(34.33-78.57)       | P=0.7194 |
| AFP, (ng/mL)                            | 5.89(2.72-38.51)       | 3.575(2.40-16.23)        | P=0.0008 |
| ≥400 ng/ml, n (%)                       | 30(10.03)              | 40(9.59)                 | P=0.899  |
| ≥20 ng/ml, n (%)                        | 88(29.43)              | 92(22.06)                | P=0.429  |
| <20 ng/ml, n (%)                        | 211(70.57)             | 257(61.63)               |          |
| Albumin(μmol/L)                         | 40.65(34.0-44.53)      | 42(36-46)                | P=0.0030 |
| Total bilirubin(μmol/L)                 | 17.5(13.5-29.2)        | 17.8(12.85-27.5)         | P=0.5580 |
| HBeAg-Positive, n (%)                   | 72(24.08)              | 111(26.62)               | P=0.487  |
| Cirrhosis, n (%)                        |                        |                          | P=0.096  |
| Yes                                     | 158(52.84)             | 194(46.52)               |          |
| No                                      | 141(47.15)             | 223(53.47)               |          |
| Child class, n (%)                      |                        |                          | P=0.035  |
| A                                       | 241(80.60)             | 332(79.61)               |          |
| B                                       | 47(15.71)              | 62(14.8)                 |          |
| C                                       | 10(3.34)               | 9(2.15)                  |          |
| Missing                                 | 1(0.33)                | 14(3.35)                 |          |
| BCLC stage, n (%)                       |                        |                          | P=0.383  |
| 0+A                                     | 51(17.05)              | 65(15.58)                |          |
| B                                       | 21(7.02)               | 27(6.47)                 |          |
| C-D                                     | 33(11.03)              | 35(8.39)                 |          |
| Missing                                 | 1(0.33)                | 6(1.43)                  |          |

Abbreviations: ITGBL1, Integrin beta-like 1; AFP, alpha - fetoprotein; ALT, alanine aminotransferase; AST, aspartate aminotransferase; GGT, gamma-glutamyl transpeptidase; HBeAg, hepatitis B e antigen; BCLC, Barcelona Clinic Liver Cancer staging system

## Supplementary Table 2: The value of AFP and ITGBL1 alone or in combination in the diagnosis of HBV-related HCC

|                       | AUC (95%CI)         | Sensitivity(%) | Specificity(%) | PPV(%) | NPV(%) | Positive LR | Negative LR |
|-----------------------|---------------------|----------------|----------------|--------|--------|-------------|-------------|
| <b>HCC vs At-risk</b> |                     |                |                |        |        |             |             |
| <b>Training</b>       |                     |                |                |        |        |             |             |
| ITGBL1                | 0.773 (0.716-0.823) | 66.98          | 71.62          | 62.8   | 75.2   | 2.36        | 0.46        |
| AFP20                 | 0.705 (0.644-0.760) | 58.49          | 82.43          | 70.5   | 73.5   | 3.33        | 0.5         |
| AFP400                | 0.617 (0.554-0.677) | 25.47          | 97.97          | 90.0   | 64.7   | 12.57       | 0.76        |
| ITGBL1+AFP20          | 0.840 (0.789-0.883) | 70.75          | 82.43          | 74.3   | 79.7   | 4.03        | 0.35        |
| ITGBL1+AFP400         | 0.820 (0.767-0.865) | 69.81          | 77.7           | 69.2   | 78.2   | 3.13        | 0.39        |
| <b>Validation</b>     |                     |                |                |        |        |             |             |
| ITGBL1                | 0.732 (0.682-0.778) | 62.41          | 74.07          | 59.7   | 76.2   | 2.41        | 0.51        |
| AFP20                 | 0.773 (0.725-0.816) | 60.15          | 94.44          | 87.0   | 79.4   | 10.83       | 0.42        |
| AFP400                | 0.650 (0.598-0.700) | 30.08          | 100            | 100    | 69.9   |             | 0.7         |
| ITGBL1+AFP20          | 0.868 (0.828-0.902) | 69.92          | 92.13          | 84.5   | 83.3   | 8.88        | 0.33        |
| ITGBL1+AFP400         | 0.822 (0.778-0.861) | 75.94          | 74.07          | 64.3   | 83.3   | 2.93        | 0.32        |
| <b>HCC vs LC</b>      |                     |                |                |        |        |             |             |
| <b>Training</b>       |                     |                |                |        |        |             |             |
| ITGBL1                | 0.721 (0.648-0.787) | 58.49          | 77.27          | 80.5   | 53.7   | 2.57        | 0.54        |
| AFP20                 | 0.679 (0.603-0.748) | 58.49          | 77.27          | 80.5   | 53.7   | 2.57        | 0.54        |
| AFP400                | 0.627 (0.550-0.700) | 25.47          | 100            | 100    | 45.5   |             | 0.75        |
| ITGBL1+AFP20          | 0.794 (0.726-0.852) | 78.3           | 68.18          | 79.8   | 66.2   | 2.46        | 0.32        |
| ITGBL1+AFP400         | 0.793 (0.725-0.851) | 69.81          | 77.27          | 83.1   | 61.4   | 3.07        | 0.39        |
| <b>Validation</b>     |                     |                |                |        |        |             |             |
| ITGBL1                | 0.717 (0.654-0.773) | 62.41          | 73.27          | 75.5   | 59.7   | 2.33        | 0.51        |
| AFP20                 | 0.756 (0.696-0.810) | 60.15          | 91.09          | 89.9   | 63.4   | 6.75        | 0.44        |
| AFP400                | 0.650 (0.586-0.711) | 30.08          | 100            | 100    | 52.1   |             | 0.7         |
| ITGBL1+AFP20          | 0.847 (0.794-0.891) | 64.66          | 92.08          | 91.5   | 66.4   | 8.16        | 0.38        |
| ITGBL1+AFP400         | 0.811 (0.755-0.859) | 75.94          | 73.27          | 78.9   | 69.8   | 2.84        | 0.33        |

Abbreviations: ITGBL1, Integrin beta-like 1; AFP,  $\alpha$ -fetoprotein; AUC, area under curve; 95% CI, 95% confidence interval; PPV, positive predictive value; NPV, negative predictive value; LR, likelihood ratio; HCC, hepatocellular carcinoma; LC, liver cirrhosis; at-risk controls, patients with chronic hepatitis B and HBV-related cirrhosis; ITGBL1, Integrin beta-like 1; AFP, alpha fetoprotein; AFP20, 20 ng/mL of alpha fetoprotein as a cutoff value; AFP400, 400 ng/mL of alpha fetoprotein as a cutoff value.; AUC, area under curve; 95% CI, 95% confidence interval; PPV, positive predictive value; NPV, negative predictive value.

**Supplementary Table 3: Results for measurement of serum ITGBL1, AFP, or both in the detection of early-stage HBV-related HCC by the different staging systems.**

|                                                               | Training           |       |             |        |          |      |          |          | Validation         |       |             |        |          |      |          |          |
|---------------------------------------------------------------|--------------------|-------|-------------|--------|----------|------|----------|----------|--------------------|-------|-------------|--------|----------|------|----------|----------|
|                                                               | Sensitivity        |       | Specificity |        | Positive |      | Negative |          | Sensitivity        |       | Specificity |        | Positive |      | Negative |          |
|                                                               | AUC (95%CI)        | (%)   | (%)         | PPV(%) | NPV(%)   | LR   | LR       | p value  | AUC (95%CI)        | y(%)  | y(%)        | PPV(%) | NPV(%)   | LR   | LR       | p value  |
| <b>Early-stage HCC (BCLC 0+A HCC) vs HBV-LC and CHB</b>       |                    |       |             |        |          |      |          |          |                    |       |             |        |          |      |          |          |
| ITGBL1                                                        | 0.787(0.723-0.842) | 62.75 | 79.73       | 51.6   | 86.1     | 3.10 | 0.47     |          | 0.764(0.710-0.813) | 67.69 | 74.07       | 44.0   | 88.4     | 2.61 | 0.44     |          |
| AFP20                                                         | 0.638(0.567-0.704) | 45.10 | 82.43       | 46.9   | 81.3     | 2.57 | 0.67     | P=0.0049 | 0.718(0.662-0.770) | 49.23 | 94.44       | 72.7   | 86.1     | 8.86 | 0.54     | P=0.3041 |
| AFP400                                                        | 0.539(0.467-0.610) | 9.80  | 97.97       | 62.5   | 75.9     | 4.84 | 0.92     | P<0.0001 | 0.608(0.548-0.665) | 21.54 | 100         | 100    | 80.9     |      | 0.78     | P=0.0002 |
| ITGBL1+AFP20                                                  | 0.824(0.764-0.875) | 82.35 | 68.24       | 47.2   | 91.8     | 2.59 | 0.26     | P=0.0784 | 0.851(0.804-0.891) | 83.08 | 71.30       | 46.6   | 93.3     | 2.89 | 0.24     | P=0.0011 |
| ITGBL1+AFP400                                                 | 0.800(0.737-0.853) | 68.63 | 77.70       | 51.5   | 87.8     | 3.08 | 0.40     | P=0.3701 | 0.818(0.767-0.861) | 76.92 | 74.07       | 47.2   | 91.4     | 2.97 | 0.31     | P=0.0114 |
| <b>Early-stage HCC (Milan criteria HCC) vs HBV-LC and CHB</b> |                    |       |             |        |          |      |          |          |                    |       |             |        |          |      |          |          |
| ITGBL1                                                        | 0.786(0.719-0.843) | 66.67 | 75.68       | 40.0   | 90.3     | 2.74 | 0.44     |          | 0.728(0.672-0.779) | 62.12 | 74.07       | 42.3   | 86.5     | 2.40 | 0.51     |          |
| AFP20                                                         | 0.620(0.546-0.691) | 41.67 | 82.43       | 36.6   | 85.3     | 2.37 | 0.71     | P=0.0104 | 0.722(0.666-0.774) | 50.00 | 94.44       | 73.3   | 86.1     | 9.00 | 0.53     | P=0.9043 |
| AFP400                                                        | 0.518(0.443-0.592) | 5.56  | 97.97       | 40.0   | 81.0     | 2.74 | 0.96     | P<0.0001 | 0.598(0.539-0.656) | 19.70 | 100         | 100    | 80.3     |      | 0.8      | P=0.0034 |
| ITGBL1+AFP20                                                  | 0.819(0.756-0.872) | 83.33 | 68.24       | 39.0   | 94.4     | 2.62 | 0.24     | P=0.1659 | 0.836(0.788-0.878) | 62.12 | 92.13       | 70.7   | 88.8     | 7.89 | 0.41     | P=0.0002 |
| ITGBL1+AFP400                                                 | 0.790(0.724-0.847) | 69.44 | 75.00       | 40.3   | 91.0     | 2.78 | 0.41     | P=0.6784 | 0.790(0.738-0.836) | 72.73 | 74.07       | 46.2   | 89.9     | 2.81 | 0.37     | P=0.0069 |
| <b>Early-stage HCC (TNM staging HCC) vs HBV-LC and CHB</b>    |                    |       |             |        |          |      |          |          |                    |       |             |        |          |      |          |          |
| ITGBL1                                                        | 0.758(0.688-0.818) | 100   | 37.16       | 26.2   | 100      | 1.59 | 0        |          | 0.765(0.711-0.814) | 72.13 | 74.07       | 44.0   | 90.4     | 2.78 | 0.38     |          |
| AFP20                                                         | 0.609(0.534-0.681) | 39.39 | 82.43       | 33.3   | 85.9     | 2.24 | 0.74     | P=0.0159 | 0.726(0.670-0.778) | 50.82 | 94.44       | 72.1   | 87.2     | 9.15 | 0.52     | P=0.4347 |
| AFP400                                                        | 0.520(0.445-0.595) | 6.06  | 97.97       | 40.0   | 82.4     | 2.99 | 0.96     | P<0.0001 | 0.598(0.538-0.657) | 19.67 | 100         | 100    | 81.5     |      | 0.8      | P=0.0004 |
| ITGBL1+AFP20                                                  | 0.777(0.709-0.835) | 72.73 | 67.57       | 33.3   | 91.7     | 2.24 | 0.40     | P=0.3834 | 0.863(0.817-0.902) | 88.52 | 71.30       | 46.6   | 95.7     | 3.08 | 0.16     | P=0.0012 |
| ITGBL1+AFP400                                                 | 0.762(0.693-0.822) | 63.64 | 74.32       | 34.5   | 89.4     | 2.48 | 0.49     | P=0.7282 | 0.827(0.777-0.869) | 81.97 | 74.07       | 47.2   | 93.6     | 3.16 | 0.24     | P=0.0120 |

Abbreviations: ITGBL1, Integrin beta-like 1; AFP,  $\alpha$ -fetoprotein; AUC, area under curve; 95% CI, 95% confidence interval; PPV, positive predictive value; NPV, negative predictive value; LR, likelihood ratio; HCC, hepatocellular carcinoma; CHB, chronic hepatitis B virus infection; LC, liver cirrhosis, BCLC, Barcelona Clinic Liver Cancer staging system.

**Supplementary Table 4: Results for measurement of ITGBL1 in serum in the diagnosis of AFP<20ng/mL and AFP<400ng/mL patients with HBV-related HCC and early-stage HBV-related HCC.**

|                                     |            | AUC (95%CI)        | Sensitivity(%) | Specificity(%) | PPV(%) | NPV(%) | Positive LR | Negative LR |
|-------------------------------------|------------|--------------------|----------------|----------------|--------|--------|-------------|-------------|
| <b>AFP(&lt;400ng/ml)</b>            |            |                    |                |                |        |        |             |             |
| <b>HCC vs At-risk</b>               |            |                    |                |                |        |        |             |             |
|                                     | Training   | 0.772(0.712-0.825) | 70.89          | 69.66          | 56.0   | 81.5   | 2.34        | 0.42        |
|                                     | Validation | 0.745(0.693-0.793) | 65.59          | 74.07          | 52.1   | 83.3   | 2.53        | 0.46        |
| <b>HCC vs Cirrhosis</b>             |            |                    |                |                |        |        |             |             |
|                                     | Training   | 0.723(0.642-0.794) | 59.49          | 77.27          | 75.8   | 61.4   | 2.62        | 0.52        |
|                                     | Validation | 0.730(0.662-0.791) | 65.59          | 73.27          | 69.3   | 69.8   | 2.45        | 0.47        |
| <b>Early-stage HCC vs At-risk</b>   |            |                    |                |                |        |        |             |             |
|                                     | Training   | 0.788(0.723-0.844) | 69.57          | 75.17          | 47.1   | 88.6   | 2.8         | 0.4         |
|                                     | Validation | 0.768(0.712-0.817) | 70.59          | 74.07          | 39.1   | 91.4   | 2.72        | 0.4         |
| <b>Early-stage HCC vs Cirrhosis</b> |            |                    |                |                |        |        |             |             |
|                                     | Training   | 0.740(0.649-0.819) | 65.22          | 77.27          | 66.7   | 76.1   | 2.87        | 0.45        |
|                                     | Validation | 0.752(0.676-0.819) | 70.59          | 73.27          | 57.1   | 83.1   | 2.64        | 0.4         |
| <b>AFP(&lt;20ng/ml)</b>             |            |                    |                |                |        |        |             |             |
| <b>HCC vs At-risk</b>               |            |                    |                |                |        |        |             |             |
|                                     | Training   | 0.756(0.683-0.819) | 68.18          | 68.85          | 44.1   | 85.7   | 2.19        | 0.46        |
|                                     | Validation | 0.744(0.686-0.796) | 81.13          | 55.88          | 32.3   | 91.9   | 1.84        | 0.34        |
| <b>HCC vs Cirrhosis</b>             |            |                    |                |                |        |        |             |             |
|                                     | Training   | 0.698(0.595-0.788) | 61.36          | 70.59          | 64.3   | 67.9   | 2.09        | 0.55        |
|                                     | Validation | 0.737(0.658-0.807) | 79.25          | 59.78          | 53.2   | 83.3   | 1.97        | 0.35        |
| <b>Early-stage HCC vs At-risk</b>   |            |                    |                |                |        |        |             |             |
|                                     | Training   | 0.786(0.712-0.849) | 75             | 68.85          | 35.6   | 92.3   | 2.41        | 0.36        |
|                                     | Validation | 0.767(0.708-0.819) | 66.67          | 75.49          | 30.6   | 93.3   | 2.72        | 0.44        |
| <b>Early-stage HCC vs Cirrhosis</b> |            |                    |                |                |        |        |             |             |
|                                     | Training   | 0.733(0.622-0.826) | 67.86          | 70.59          | 55.9   | 80.0   | 2.31        | 0.46        |
|                                     | Validation | 0.764(0.680-0.835) | 87.88          | 55.43          | 41.4   | 92.7   | 1.97        | 0.22        |

Abbreviations: ITGBL1, Integrin beta-like 1; AFP,  $\alpha$ -fetoprotein; AUC, area under curve; 95% CI, 95% confidence interval; PPV, positive predictive value; NPV, negative predictive value; LR, likelihood ratio; HCC, hepatocellular carcinoma; CHB, chronic hepatitis B virus infection; LC, liver cirrhosis; at-risk controls, patients with chronic hepatitis B and HBV-related cirrhosis.

## Supplementary Figure 1: Diagnostic performance for serum ITGBL1 for HBV-HCC patients.

ROC curve for ITGBL1, AFP, or both, for patients with all HBV-HCC versus controls at risk of HBV-HCC in the training cohort (A). ROC curve of ITGBL1, AFP, or both, for patients with all HBV-HCC versus controls at risk of HBV-HCC in the validation cohort (B). ROC curve for ITGBL1, AFP, or both, for patients with all HBV-HCC versus controls at HBV-LC in the training cohort (C). ROC curve of ITGBL1, AFP, or both, for patients with all HBV-HCC versus controls at HBV-LC in the validation cohort (D). Abbreviations: ROC, receiver operating characteristics; HCC, hepatocellular carcinoma; At-risk controls, patients with chronic hepatitis B and HBV-related cirrhosis; HBV, hepatitis B virus; LC, liver cirrhosis; ITGBL1, Integrin beta-like 1; AFP, alpha fetoprotein; AFP20, 20 ng/mL of alpha fetoprotein as a cutoff value; AFP400, 400 ng/mL of alpha fetoprotein as a cutoff value.

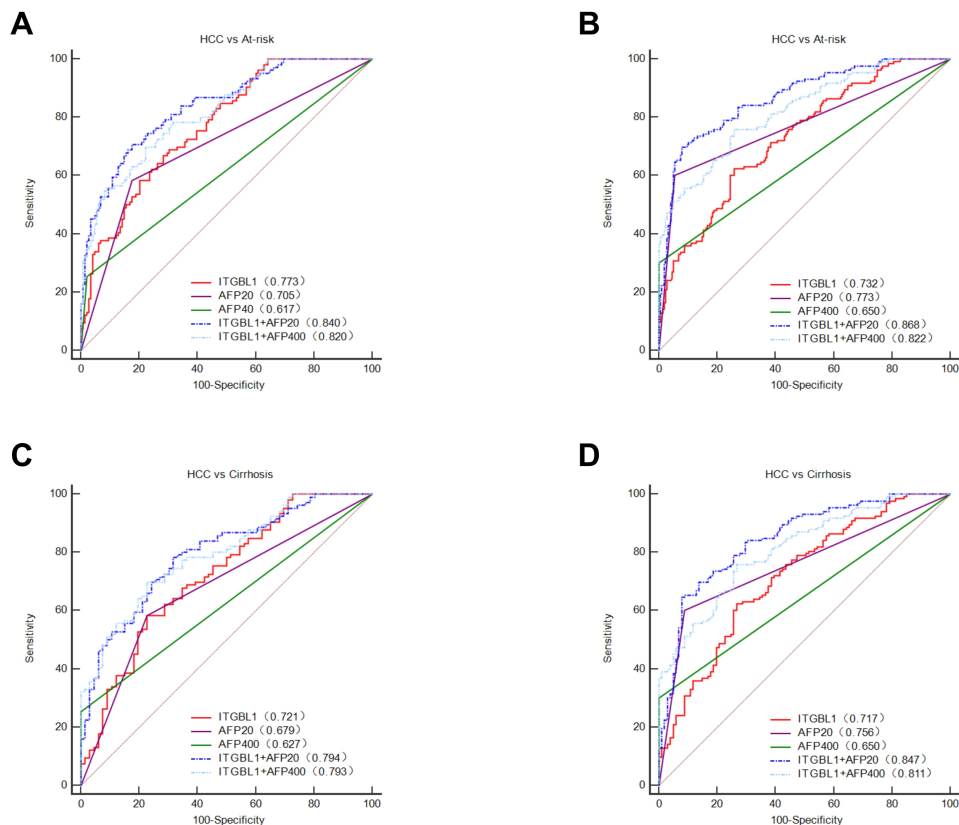

## **Supplementary Figure 2: Diagnostic performance for serum ITGBL1 in AFP <400 ng/mL HBV-HCC patients and early-stage HBV-HCC**

ROC curve for ITGBL1 distinguishing individuals with AFP <400 ng/mL HBV-HCC from at-risk groups in the training cohort(A). ROC curve for ITGBL1 distinguishing individuals with AFP <400 ng/mL HBV-HCC from at-risk groups in the validation cohort(B). ROC curve for ITGBL1 distinguishing individuals with AFP <400 ng/mL HBV-HCC from HBV-LC patients in the training cohort (C). ROC curve for ITGBL1 distinguishing individuals with AFP <400 ng/mL HBV-HCC from HBV-LC patients in the validation cohort (D). ROC curve of ITGBL1 distinguishing individuals with AFP <400 ng/mL early-stage HBV-HCC from at-risk groups the training cohort (E). ROC curve of ITGBL1 distinguishing individuals with AFP <400 ng/mL early-stage HBV-HCC from at-risk groups the validation cohort (F). ROC curve of ITGBL1 distinguishing individuals with AFP <400 ng/mL HBV-HCC from HBV-HCC patients the training cohort(G). ROC curve of ITGBL1 distinguishing individuals with AFP <400 ng/mL HBV-HCC from HBV-HCC patients the validation cohort(G). Abbreviations: ROC, receiver operating characteristics; HCC, hepatocellular carcinoma; At-risk groups, patients with chronic hepatitis B and HBV-related cirrhosis; HBV, hepatitis B virus; LC, liver cirrhosis; ITGBL1, Integrin beta-like 1; AFP, alpha fetoprotein; AUC, area under the ROC curve; CI, confidence interval.



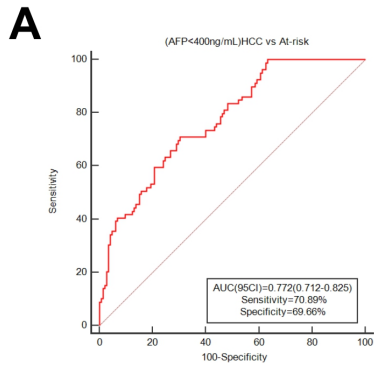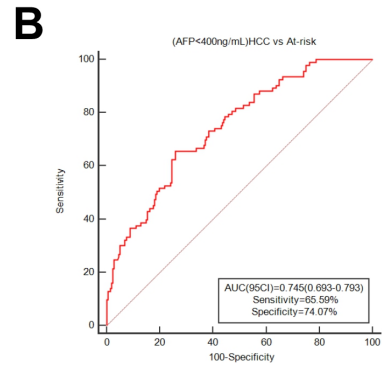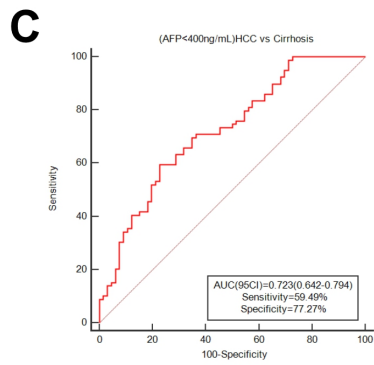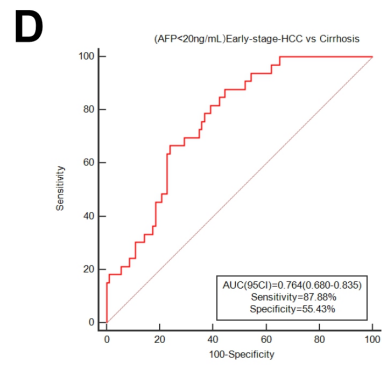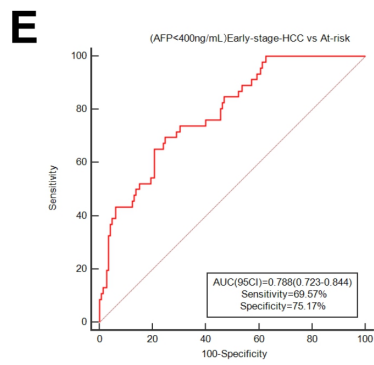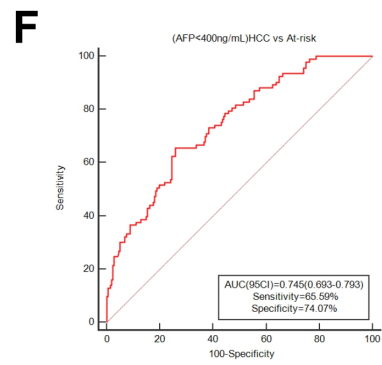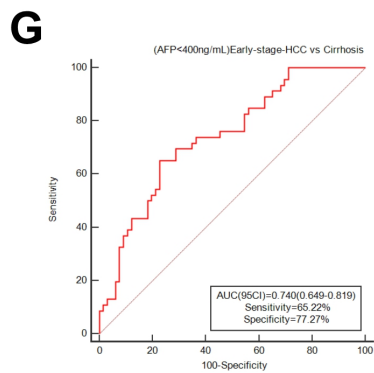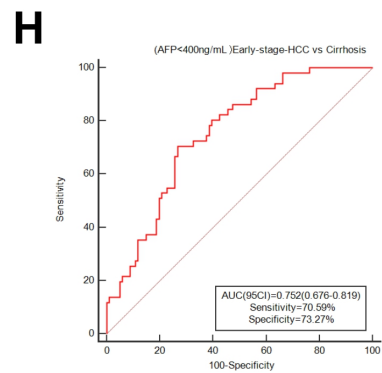

### Supplementary Figure 3: Comparison of ITGBL1 levels in serum of non-HCC and HBV-HCC patients with normal and elevated ALT.

The level of ITGBL1 in serum of the non-HCC and HBV-HCC patients with normal and elevated ALT in training cohort (A). The level of ITGBL1 in serum of the non-HCC and HBV-HCC patients with normal and elevated ALT in validation cohort (B). Black horizontal lines are median and quartiles. Abbreviations: ITGBL1, Integrin beta-like 1; HCC, hepatocellular carcinoma; HBV, hepatitis B virus; non-HCC groups, patients with chronic hepatitis B and HBV-related cirrhosis; ALT, alanine aminotransferase; NS, not significant.

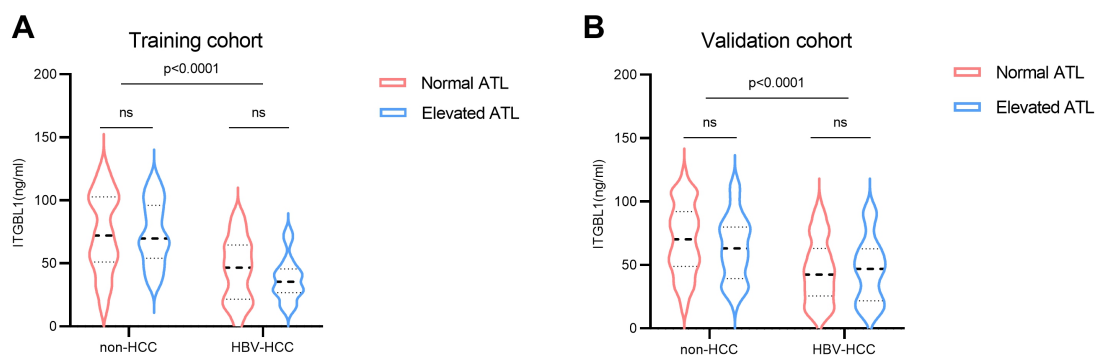

### Supplementary Figure 4: The level of ITGBL1 in serum of non-HCC and HBV-HCC patients with different HBV DNA levels.

The level of ITGBL1 in serum of the non-HCC patients with different HBV DNA level (A). The level of ITGBL1 in serum of the HBV-HCC patients with different HBV DNA level (B). Black horizontal lines are median and quartiles. Abbreviations: ITGBL1, Integrin beta-like 1; HCC, hepatocellular carcinoma; HBV, hepatitis B virus; non-HCC groups, patients with chronic hepatitis B and HBV-related cirrhosis; NS, not significant.

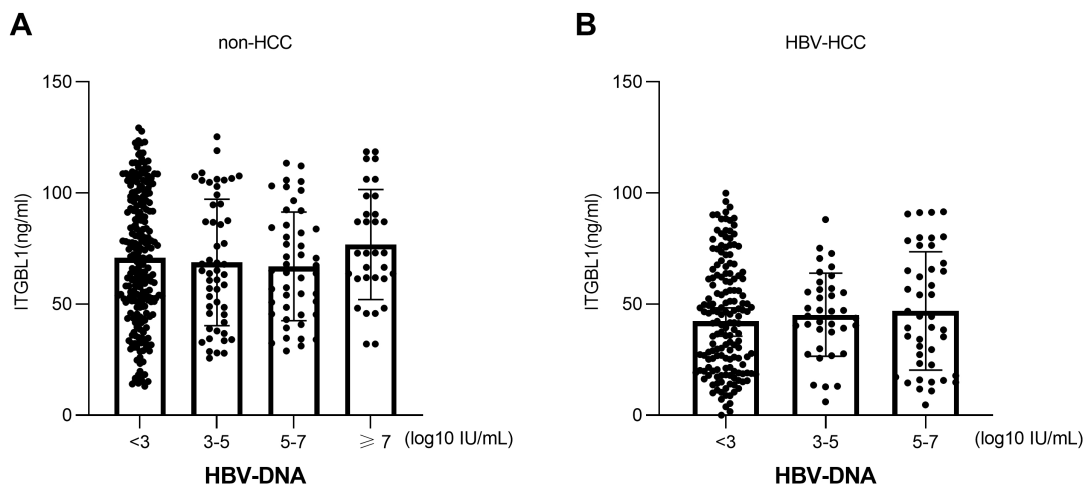

## Supplementary Figure 5: Comparison of ITGBL1 levels in serum of non-HCC and HBV-HCC patients with antiviral therapy or not.

The level of ITGBL1 in serum of the non-HCC and HBV-HCC patients with antiviral therapy and no treatment in training cohort (A). The level of ITGBL1 in serum of the non-HCC and HBV-HCC patients with antiviral therapy and no treatment in validation cohort (B). Black horizontal lines are median and quartiles. Abbreviations: ITGBL1, Integrin beta-like 1; HCC, hepatocellular carcinoma; HBV, hepatitis B virus; non-HCC groups, patients with chronic hepatitis B and HBV-related cirrhosis; NS, not significant.

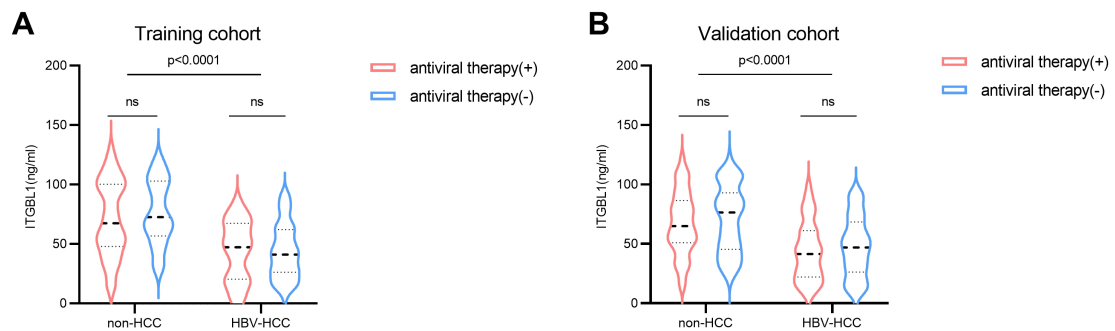

Supplement: Supplementary file 1 [file get_supplementary_file.php]
